# Supplementary material for: Molecular engineering of Ga-ketoiminates: synthesis, structure and evaluation as precursors for the additive-free spin-coated deposition of gallium oxide thin films
Source: Royal Society of Chemistry journal article supplement (doi:10.1039/c7nj04334a), 2018-01-01
Supplement: c7nj04334a1.pdf [file c7nj04334a1.pdf]

## Supporting information

### Molecular engineering of Ga-ketoiminates: Synthesis, structure and evaluation as precursors for the additive-free spin-coated deposition of gallium oxide thin films

Richard O'Donoghue,<sup>a</sup> Shafiqur Rahman,<sup>a</sup> Bert Mallick,<sup>a</sup> Manuela Winter,<sup>a</sup> Detlef Rogalla,<sup>b</sup> Hans-Werner Becker<sup>b</sup> and Anjana Devi<sup>a\*</sup>

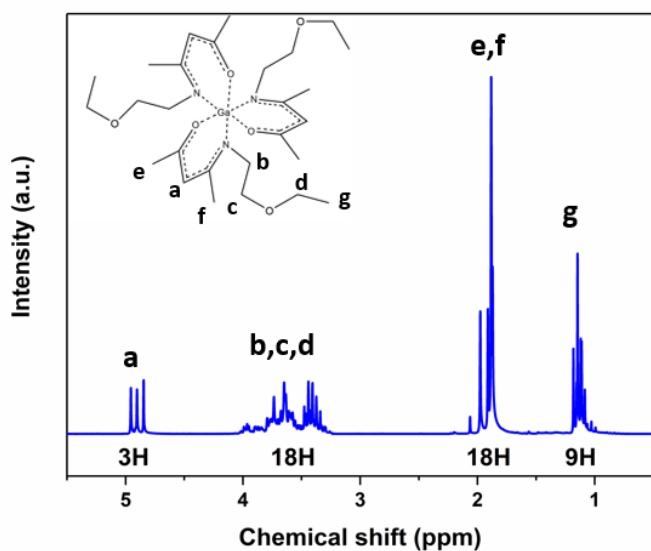

Figure S1. <sup>1</sup>H NMR spectrum of compound [1] – [Ga(eeki)<sub>3</sub>].

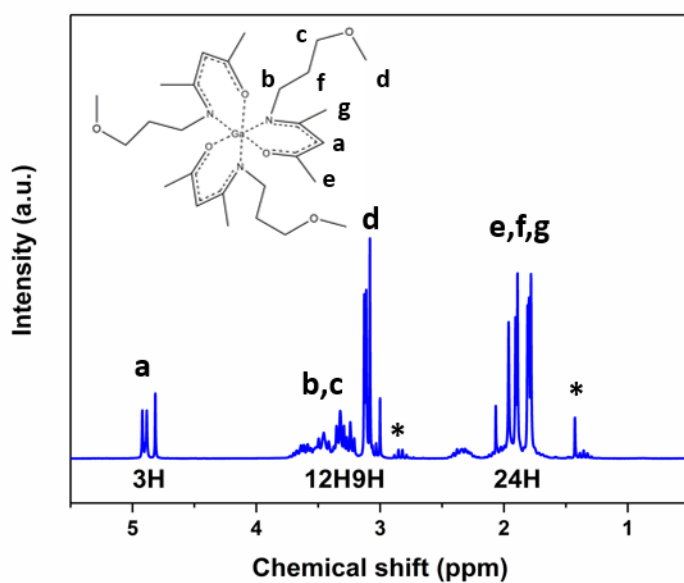

Figure S2. <sup>1</sup>H NMR spectrum of compound [2] – [Ga(mpki)<sub>3</sub>]. \* = Ligand.

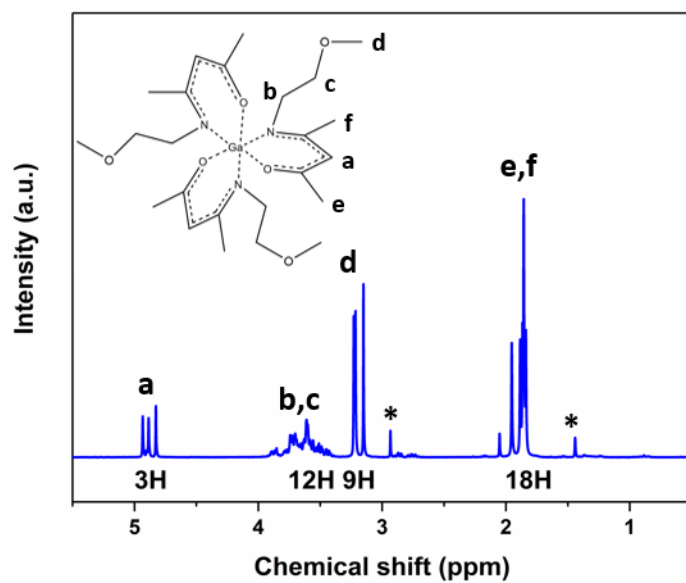

Figure S3.  $^1\text{H}$  NMR spectrum of compound [3] –  $[\text{Ga}(\text{meki})_3]$ . \* = Ligand.

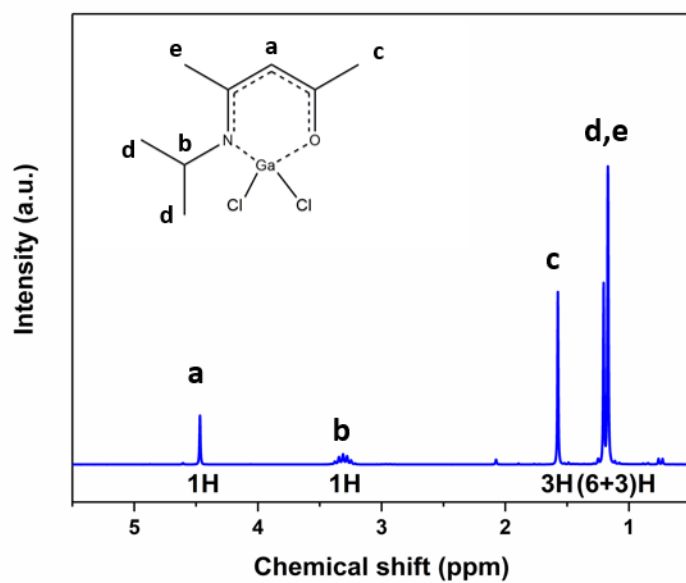

Figure S4.  $^1\text{H}$  NMR spectrum of compound [4] –  $[\text{Ga}(\text{ipki})\text{Cl}_2]$ .

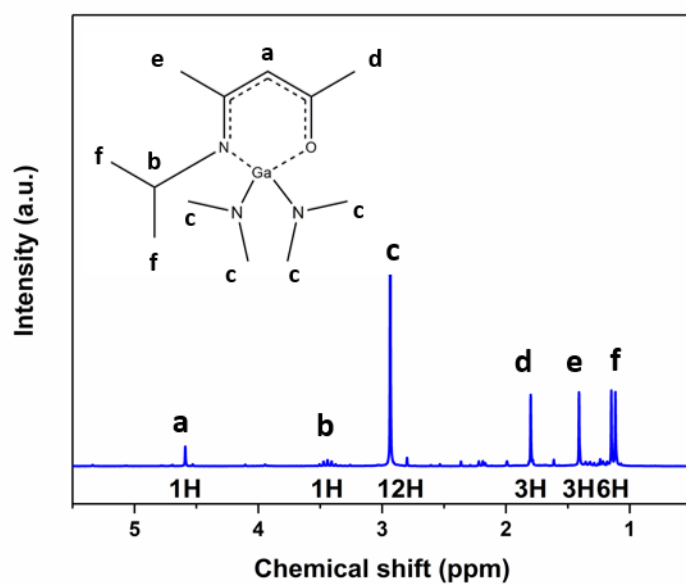

Figure S5.  $^1\text{H}$  NMR spectrum of compound [5] –  $[\text{Ga}(\text{ipki})(\text{NMe}_2)_2]$ .

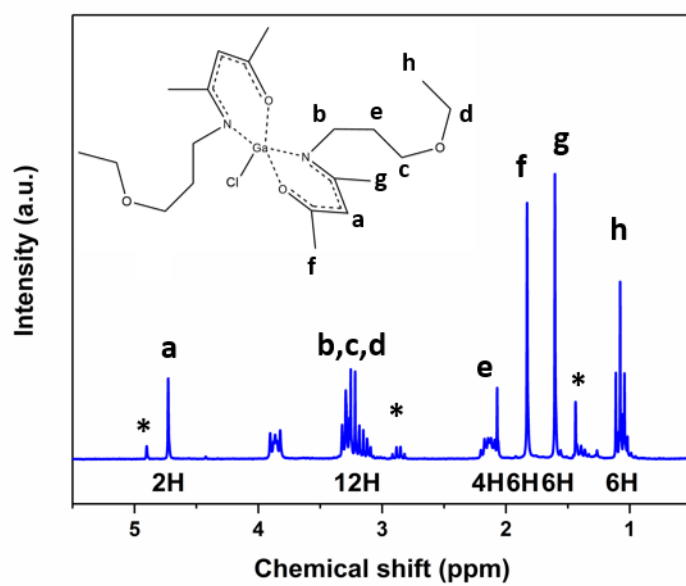

Figure S6.  $^1\text{H}$  NMR spectrum of compound [6] –  $[\text{Ga}(\text{epki})\text{Cl}_2]$ . \* = Ligand.

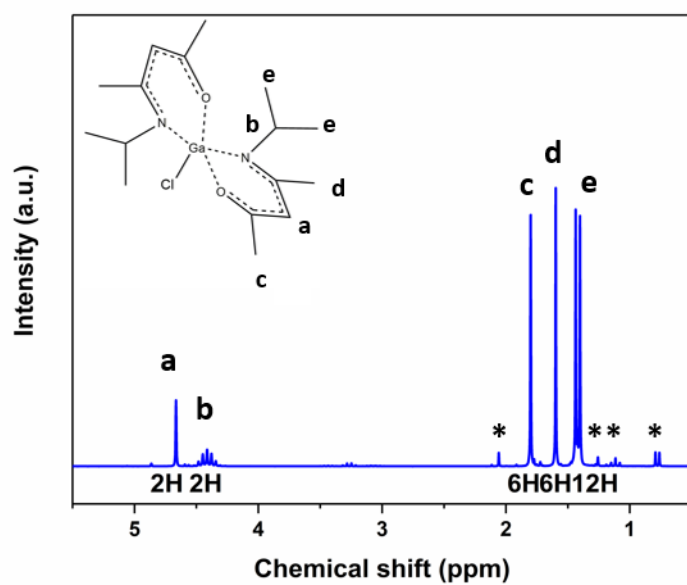

Figure S7.  $^1\text{H}$  NMR spectrum of compound [7] -  $[\text{Ga}(\text{ipki})_2\text{Cl}]$ . \* = Ligand

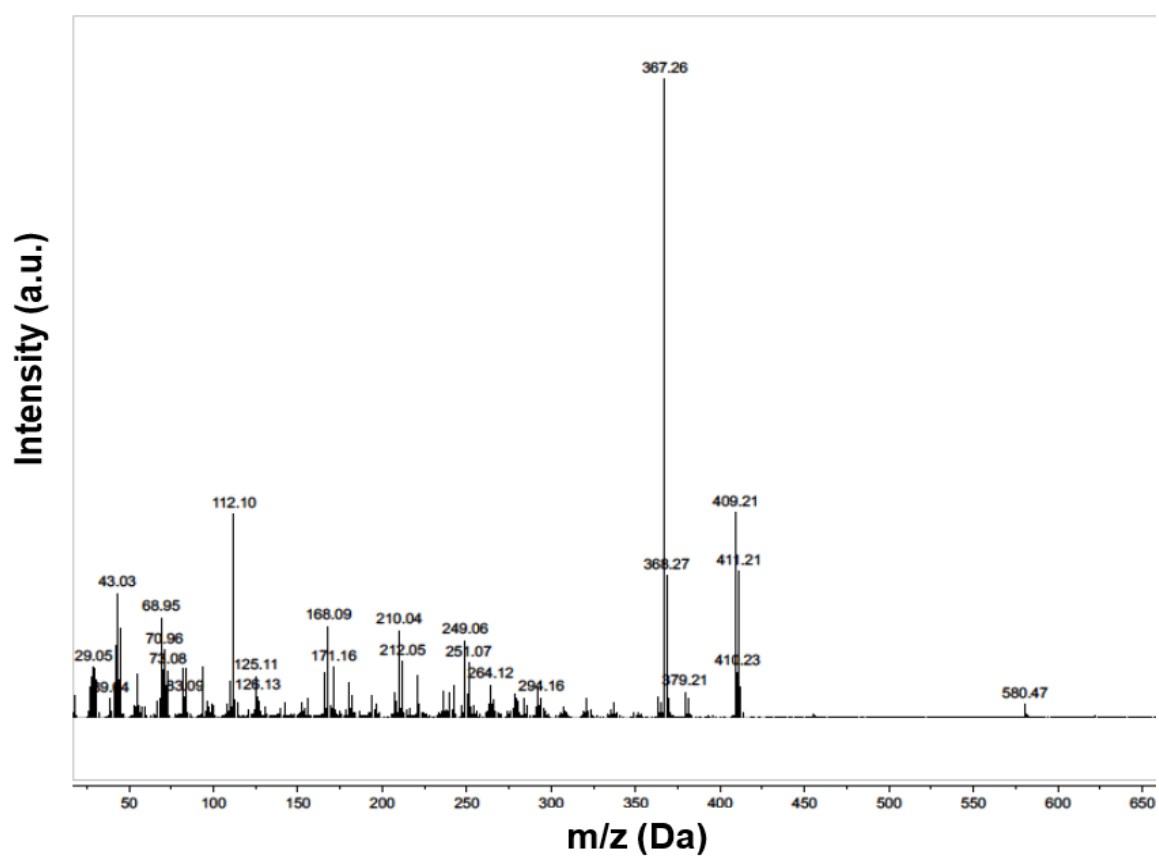

Figure S8. EI-MS spectrum of compound [1].

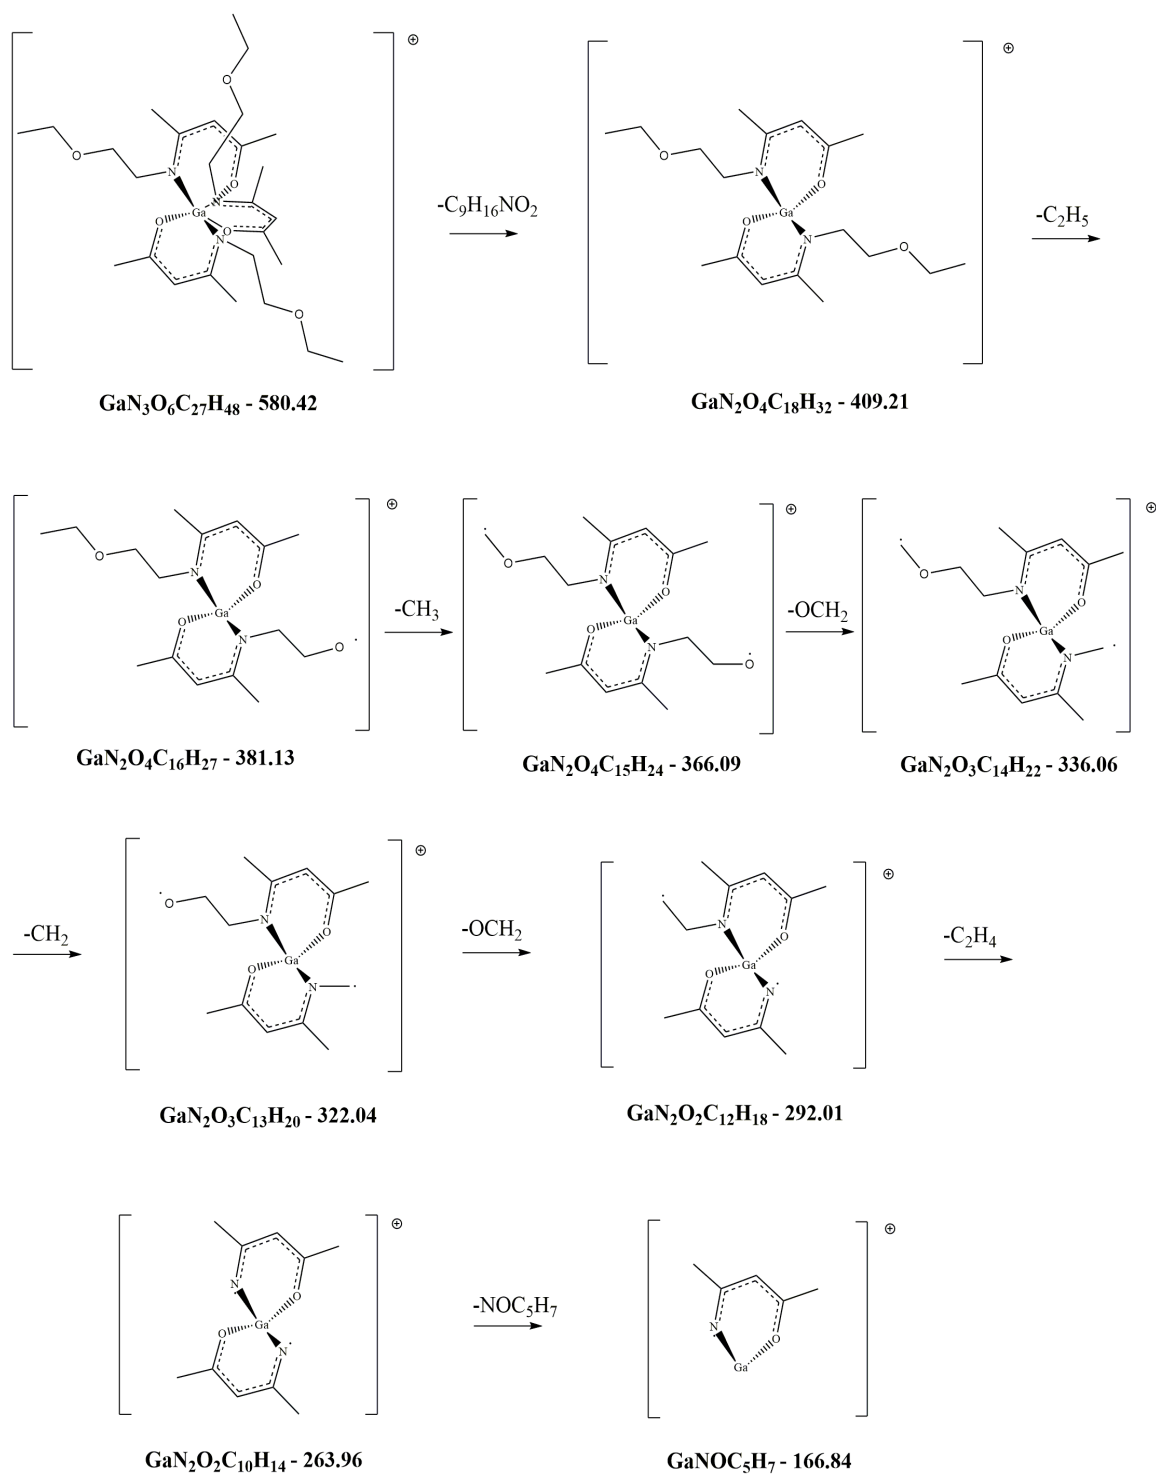

**Figure S9.** Proposed fragmentation pattern for the EI-MS data in Figure S2

**Table S1.** Overview of the fragments observed in the EI-MS spectra of compound [4].

| <b>Fragments</b>                                                          | <b>m / z</b> | <b>Intensity [%]</b> |
|---------------------------------------------------------------------------|--------------|----------------------|
| [M <sup>+</sup> ]                                                         | 281.0        | 17.65                |
| [M <sup>+</sup> - ·CH <sub>3</sub> ]                                      | 264.0        | 100.00               |
| [M <sup>+</sup> - ·Cl]                                                    | 244.0        | 54.99                |
| [M <sup>+</sup> - ·CH <sub>3</sub> - ·Cl]                                 | 228.0        | 71.23                |
| [M <sup>+</sup> - ·CH(CH <sub>3</sub> ) <sub>2</sub> - ·CH <sub>3</sub> ] | 186.0        | 9.03                 |
| [Ligand <sup>+</sup> ]                                                    | 140.9        | 18.66                |
| [M <sup>+</sup> - 1x Ligand]                                              | 138.9        | 13.71                |
| [Ga <sup>+</sup> ]                                                        | 68.9         | 15.18                |
| [H <sub>2</sub> CCHCH <sub>3</sub> <sup>+</sup> ]                         | 42.0         | 44.92                |
| [H <sub>2</sub> CCH <sup>+</sup> ]                                        | 27.0         | 14.06                |

**Table S2.** Overview of the fragments observed in the EI-MS spectra of compound [5].

| <b>Fragments</b>                                                          | <b>m / z</b> | <b>Intensity [%]</b> |
|---------------------------------------------------------------------------|--------------|----------------------|
| [M <sup>+</sup> ]                                                         | 298.2        | 1.53                 |
| [M <sup>+</sup> - N(CH <sub>3</sub> ) <sub>2</sub> ]                      | 253.1        | 78.75                |
| [M <sup>+</sup> - ·2N(CH <sub>3</sub> ) <sub>2</sub> ]                    | 209.3        | 47.40                |
| [M <sup>+</sup> - 2N(CH <sub>3</sub> ) <sub>2</sub> - ·2CH <sub>3</sub> ] | 166.0        | 1.53                 |
| [Ligand <sup>+</sup> ]                                                    | 140.1        | 0.78                 |
| [Ligand <sup>+</sup> - ·CH <sub>3</sub> ]                                 | 108.1        | 7.59                 |
| [Ligand <sup>+</sup> - 2x ·CH <sub>3</sub> ]                              | 83.1         | 7.33                 |
| [Ga <sup>+</sup> ]                                                        | 68.9         | 48.22                |
| [H <sub>2</sub> CCHCH <sub>3</sub> <sup>+</sup> ]                         | 42.0         | 100.00               |
| [H <sub>2</sub> CCH <sup>+</sup> ]                                        | 27.0         | 12.04                |

**Table S3.** Overview of the fragments observed in the EI-MS spectra of compound [6].

| <b>Fragments</b>                                                                                               | <b>m / z</b> | <b>Intensity [%]</b> |
|----------------------------------------------------------------------------------------------------------------|--------------|----------------------|
| [M <sup>+</sup> ]                                                                                              | 474.2        | 1.21                 |
| [M <sup>+</sup> - ·Cl]                                                                                         | 439.2        | 64.74                |
| [M <sup>+</sup> - ·Cl - ·OCH <sub>2</sub> CH <sub>3</sub> ]                                                    | 395.2        | 21.46                |
| [M <sup>+</sup> - ·Cl - 2CH <sub>2</sub> CH <sub>2</sub> OCH <sub>2</sub> CH <sub>3</sub> ]                    | 292.1        | 6.53                 |
| [M <sup>+</sup> - ·Cl - 2CH <sub>2</sub> CH <sub>2</sub> OCH <sub>2</sub> CH <sub>3</sub> - 4CH <sub>3</sub> ] | 223.1        | 2.55                 |
| [Ligand <sup>+</sup> ]                                                                                         | 186.2        | 18.42                |
| [Ga <sup>+</sup> ]                                                                                             | 68.9         | 3.20                 |
| [H <sub>2</sub> CCHCH <sub>3</sub> <sup>+</sup> ]                                                              | 42.0         | 7.80                 |
| [H <sub>2</sub> CCH <sup>+</sup> ]                                                                             | 27.0         | 4.41                 |

**Table S4.** Overview of the fragments observed in the EI-MS spectra of compound [7].

| Fragments                                                                          | m / z | Intensity [%] |
|------------------------------------------------------------------------------------|-------|---------------|
| [M <sup>+</sup> ]                                                                  | 384.2 | 26.70         |
| [M <sup>+</sup> - ·CH <sub>3</sub> ]                                               | 371.1 | 21.46         |
| [M <sup>+</sup> - ·Cl]                                                             | 349.2 | 90.83         |
| [M <sup>+</sup> - ·Cl - 4x ·CH <sub>3</sub> ]                                      | 291.1 | 13.66         |
| [M <sup>+</sup> - ·Cl - 3x ·CH <sub>3</sub> - ·CH(CH <sub>3</sub> ) <sub>2</sub> ] | 264.1 | 26.77         |
| [M <sup>+</sup> - ·Cl - 4x ·CH <sub>3</sub> - ·CH(CH <sub>3</sub> ) <sub>2</sub> ] | 249.1 | 22.47         |
| [M <sup>+</sup> - 1x Ligand]                                                       | 244.0 | 100.00        |
| [M <sup>+</sup> - 1x Ligand - ·CH <sub>3</sub> ]                                   | 228.0 | 18.54         |
| [M <sup>+</sup> - 1x Ligand - ·OCCH <sub>3</sub> ]                                 | 202.0 | 35.37         |
| [Ligand <sup>+</sup> ]                                                             | 140.1 | 68.12         |
| [Ligand <sup>+</sup> - ·CH <sub>3</sub> ]                                          | 126.1 | 23.61         |
| [Ligand <sup>+</sup> - 2x ·CH <sub>3</sub> ]                                       | 108.1 | 18.36         |
| [Ligand <sup>+</sup> - ·CH <sub>3</sub> - ·CH(CH <sub>3</sub> ) <sub>2</sub> ]     | 83.1  | 24.84         |
| [Ga <sup>+</sup> ]                                                                 | 68.9  | 33.00         |
| [H <sub>2</sub> CCHCH <sub>3</sub> <sup>+</sup> ]                                  | 42.0  | 73.07         |
| [H <sub>2</sub> CCH <sup>+</sup> ]                                                 | 27.0  | 21.51         |

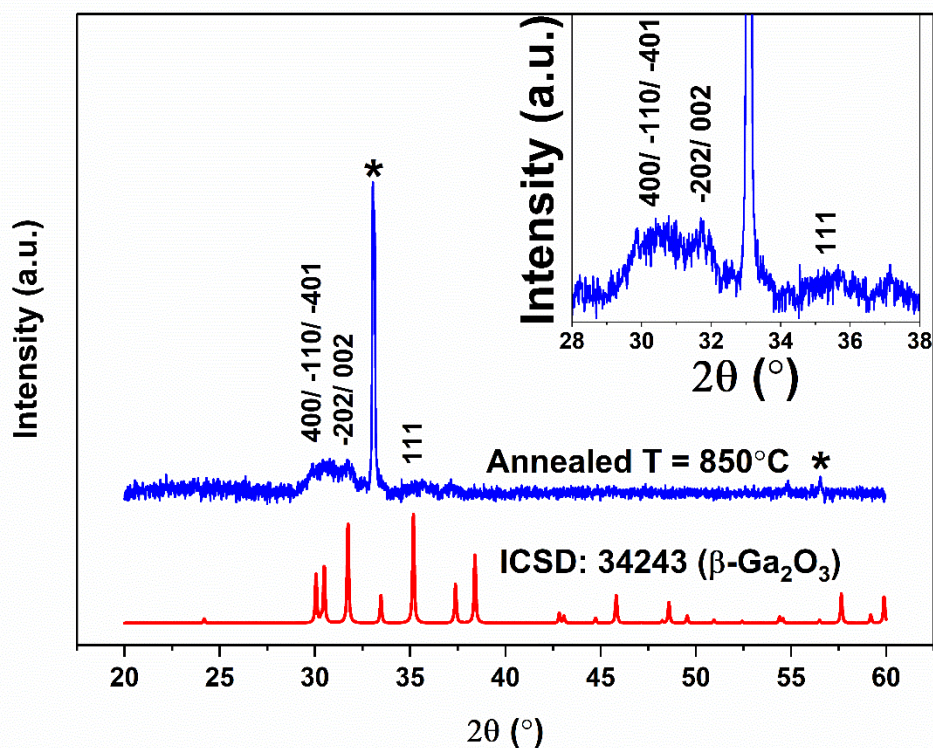**Figure S10.** XRD pattern of the gallium oxide thin film from a process deposited on Si(100) using compound [1] with 25 spin coating cycles at a hotplate temperature of 350 °C after an annealing at 850 °C for 2 h under ambient conditions. The β-gallium oxide reference pattern in red corresponds to the ICSD no. 34243. The Inset shows a close up of the obtained reflexes. \* = silicon substrate.

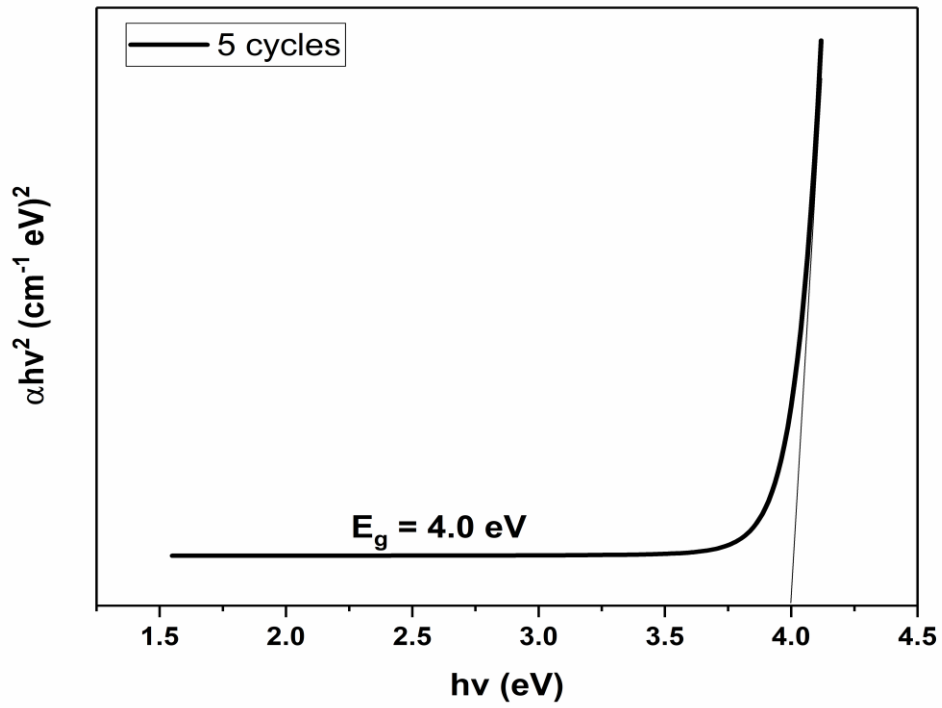

Figure S11. Tauc plot derived from the transmittance data of the sample deposited with 5 spin-cycles.

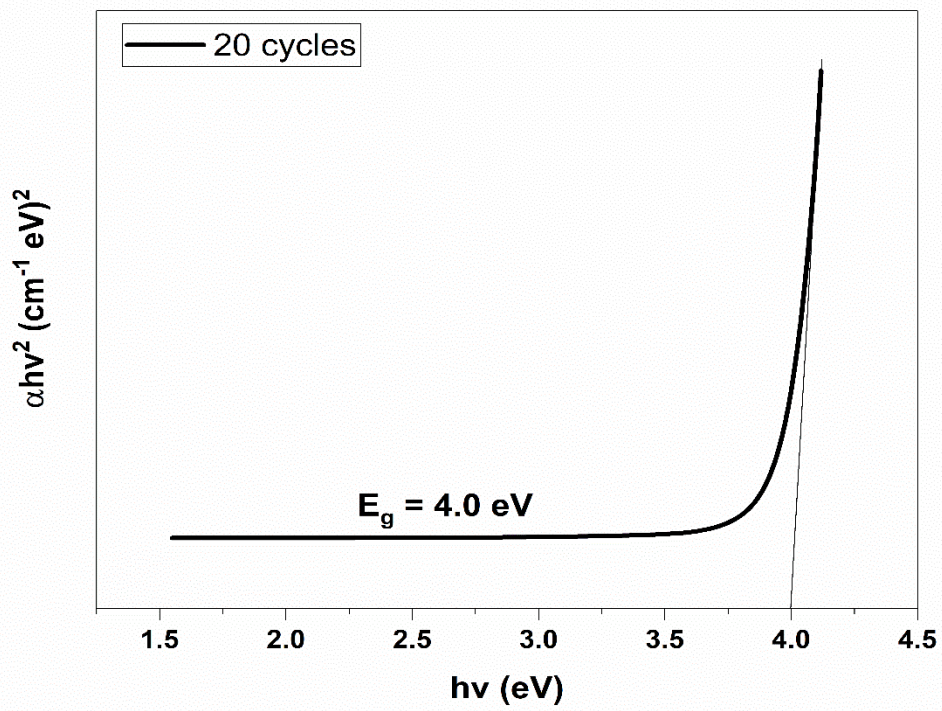

Figure S12. Tauc plot derived from the transmittance data of the sample deposited with 20 spin-cycles.



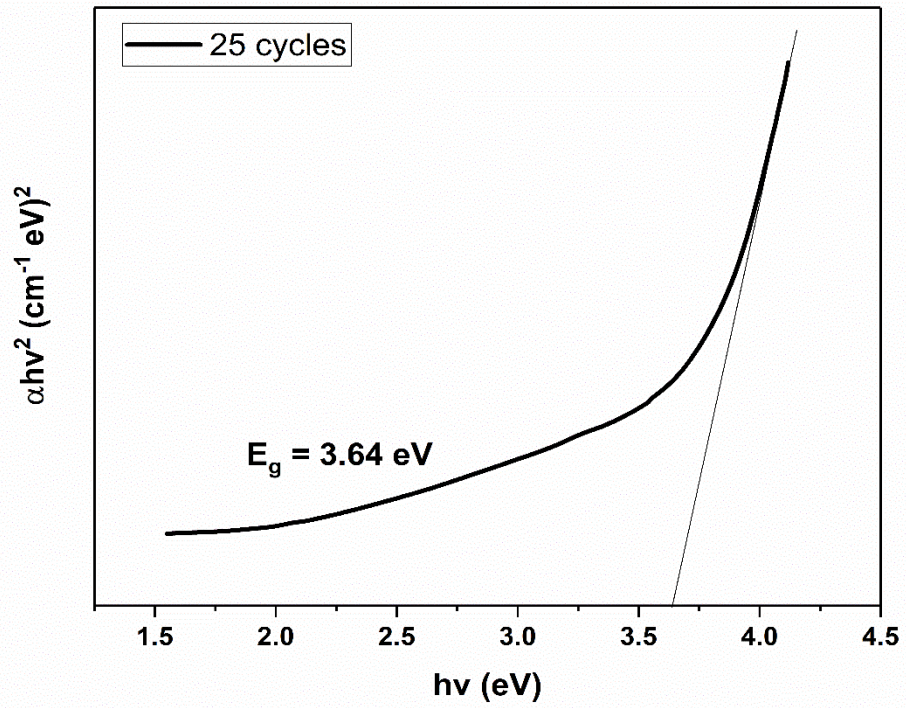

**Figure S13.** Tauc plot derived from the transmittance data of the sample deposited with 25 spin-cycles
